# Supplementary material
Source: PubMed Central journal article supplement (PMC4766954)
Supplement: DS_10.1177_0022034515613508.pdf [file DS_10.1177_0022034515613508.pdf]

# Excess BMP Signaling in Heterotopic Cartilage Forming in *Prg4*-null TMJ Discs

Journal of Dental Research  
DSI-DS3  
© International & American Associations  
for Dental Research 2015  
Reprints and permissions:  
sagepub.com/journalsPermissions.nav  
DOI: 10.1177/0022034515613508  
jdr.sagepub.com

T.E. Bechtold<sup>1,3</sup>, C. Saunders<sup>1</sup>, C. Mundy<sup>1</sup>, H. Um<sup>1</sup>, R.S. Decker<sup>1</sup>,  
I. Salhab<sup>2</sup>, N. Kurio<sup>2</sup>, P.C. Billings<sup>1</sup>, M. Pacifici<sup>1</sup>, H.D. Nah<sup>2</sup>,  
and E. Koyama<sup>1</sup>

## Appendix

### Immunocytochemistry

Immunocytochemistry was performed for the detection of phosphorylated Smad 1/5/8 nuclear translocation. Disc cells from wild-type mice at 2 mo of age were plated onto 3 to 4 coverslips placed in 6-well culture plates at a density of approximately 30,000 cells per well and cultured in Dulbecco's modified Eagle's medium containing 10% fetal bovine serum for 12 h. Cultures were serum depleted (Dulbecco's modified Eagle's medium + 0.1% fetal bovine serum) for 12 h and then stimulated with recombinant human bone morphogenetic protein 2 at a concentration of 100 ng/mL for 10, 30, and 60 min. Cultures were fixed with 2% paraformaldehyde for 20 min, permeabilized in 0.2% Triton X-100 for 10 min, and then blocked with Tween-20 in phosphate-buffered saline / 1% bovine serum albumin. The cultures were incubated with a rabbit phosphorylated Smad 1/5/8 primary antibody (1:100; Cell Signaling, Beverly, MA, USA) for 12 h at 4 °C. The cultures were then incubated with an Alexa Fluor 488-conjugated goat anti-rabbit polyclonal secondary antibody (1:200; Jackson ImmunoResearch Laboratories, Inc., West Grove, PA, USA) with rhodamine phalloidin (1:50; Life Technologies, Grand Island, NY, USA) for 1 h at room temperature. The coverslips were mounted with the Vectashield HardSet antifade mounting medium containing DAPI for nuclear counterstain (Vector Laboratories, Inc., Burlingame, CA, USA).

### Quantitative and Semiquantitative PCR Analyses

Total RNA was extracted from articular discs from *Prg4* mutants and age-matched wild-type littermates at 2 and 6 mos of age and the day 10 micromass cultures by TRIzol reagent (Invitrogen, Carlsbad, CA, USA) according to the manufacturer's protocols, and yields were quantified with a NanoDrop spectrophotometer (Life Technologies). Briefly, 2 µg of total RNA was reverse transcribed with the SuperScript III First-Strand Synthesis System (Life Technologies). Quantitative real-time polymerase chain reaction (PCR) was carried out with the SYBR Green PCR Master Mix (Qiagen, Valencia,

CA, USA) and Applied Biosystems 7500 (Life Technologies) according to manufacturers' protocol. *Gapdh* was used as an endogenous control, and relative expression was calculated with the  $\Delta\Delta C_t$  method. Primer information is presented in the Appendix Table. Semiquantitative PCR was performed to detect the relative abundance of expressed genes in the same cDNA samples prepared for real-time PCR.

### In Situ Hybridization

cDNA clones used as templates for probes included: *Sox9* (nt. 116-856; NM\_011448), collagen II (*Col II*; nt. 1095-1344; X57982), collagen X (nt. 1302-1816; NM009925), *Bmp2* (nt. 952-1299; XM\_006498619), *Prg4* (nt. 41-2646; AB034730), and aggrecan (*Acan*; nt. 880-1733; NM\_007424).

### Statistical Analysis

Data were validated by 2-tailed Student's *t* tests. The threshold for significance for all tests was set as  $P < 0.05$ .

<sup>1</sup>Division of Orthopaedic Surgery, Department of Surgery, The Children's Hospital of Philadelphia, Philadelphia, PA, USA

<sup>2</sup>Division of Plastic and Reconstructive Surgery, Department of Surgery, The Children's Hospital of Philadelphia, Philadelphia, PA, USA

<sup>3</sup>Department of Orthodontics and Orofacial Orthopaedics, Center of Dentistry, Oral Medicine and Maxillofacial Surgery, University Hospital Tuebingen, Tuebingen, Germany

### Corresponding Author:

E. Koyama, Division of Orthopaedic Surgery, The Children's Hospital of Philadelphia, 3615 Civic Center Boulevard, ARC Suite 902, Philadelphia, PA 19104, USA.

Email: koyamae@email.chop.edu

**Appendix Table.** Primer Information.

| Gene          | Accession No. | Forward Sequence (5'-3') | Reverse Sequence (5'-3') | Size, bp |
|---------------|---------------|--------------------------|--------------------------|----------|
| <i>Acan</i>   | NM_007424     | GGAGCGAGTCCAACCTTCA      | CGCTCAGTGAGTTGTCATGG     | 120      |
| <i>Bmp2</i>   | NM_007553     | TCTTCCGGGAACAGATACAGG    | TCTCCTCTAAATGGGCCACTT    | 249      |
| <i>Bmp4</i>   | NM_007554     | TCCATCACGAAGAACATC       | TAGTCGTGTGATGAGGTG       | 239      |
| <i>Col2α1</i> | NM_031163     | CTACGGTGTCAGGGCCAG       | GTGTCACACACACAGATGCG     | 116      |
| <i>Runx2</i>  | NM_001146038  | CCGTGGCCTTCAAGGTTGT      | TTCATAACAGCGGAGGCATT     | 118      |
| <i>Sox9</i>   | NM_0011448    | GAGCTCAGCAAGACTCTGGG     | CGGGGCTGGTACTTGTAATC     | 13       |
| <i>ColX</i>   | NM_009925     | ACCAGGAATGCCTTGTTCTC     | CCTGGTTCATGGGATGTTTT     | 120      |
| <i>Bmpr1a</i> | NM_009758     | GGCAATGACTTTCACCTGCT     | GGTCAAAGCTGTTCGGAGAA     | 249      |
| <i>Bmpr1b</i> | NM_007560     | TCCAGAGCTTCGTAAGAGCA     | ATTTGGCGCTGAGCTATGAC     | 239      |
| <i>Acrv1</i>  | NM_001110204  | GAGGCCCTCACACACACAC      | TGCTAATGATGATGGCTTTCC    | 116      |
| <i>Bmpr2</i>  | NM_007561     | CACACAGCCGTTCTTGATT      | AGGGATGACTTCCTCGCTG      | 118      |
| <i>Gapdh</i>  | NM_008084     | ATCTTGGGCTACACTGAGGA     | CAGGAAATGAGCTTGACAAAGT   | 122      |
| <i>Col1a2</i> | NM_007743     | AGCAGGTCCTTGGAACCTT      | AAGGAGTTTCATCTGGCCCT     | 101      |

bp, base pairs.

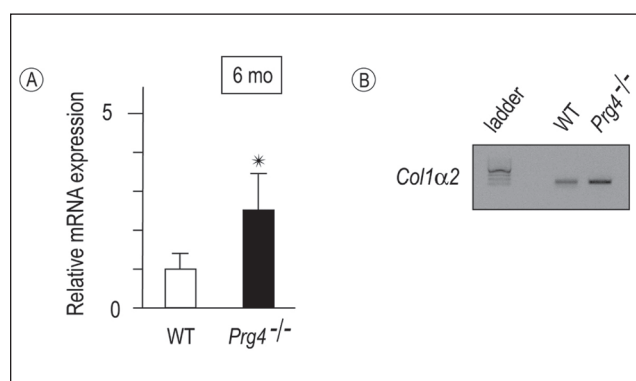

**Appendix Figure 1.** Comparative expression levels of type I collagen (*Col1a2*) in temporomandibular joint discs. **(A)** Histograms depicting the relative expression of *Col1a2* in *Prg4*<sup>-/-</sup> and control discs at 6 mo of age and presented as average  $\pm$  SD ( $n = 3$  for mouse/each group,  $*P < 0.05$ ). **(B)** Semiquantitative reverse transcription polymerase chain reaction. WT, wild type.

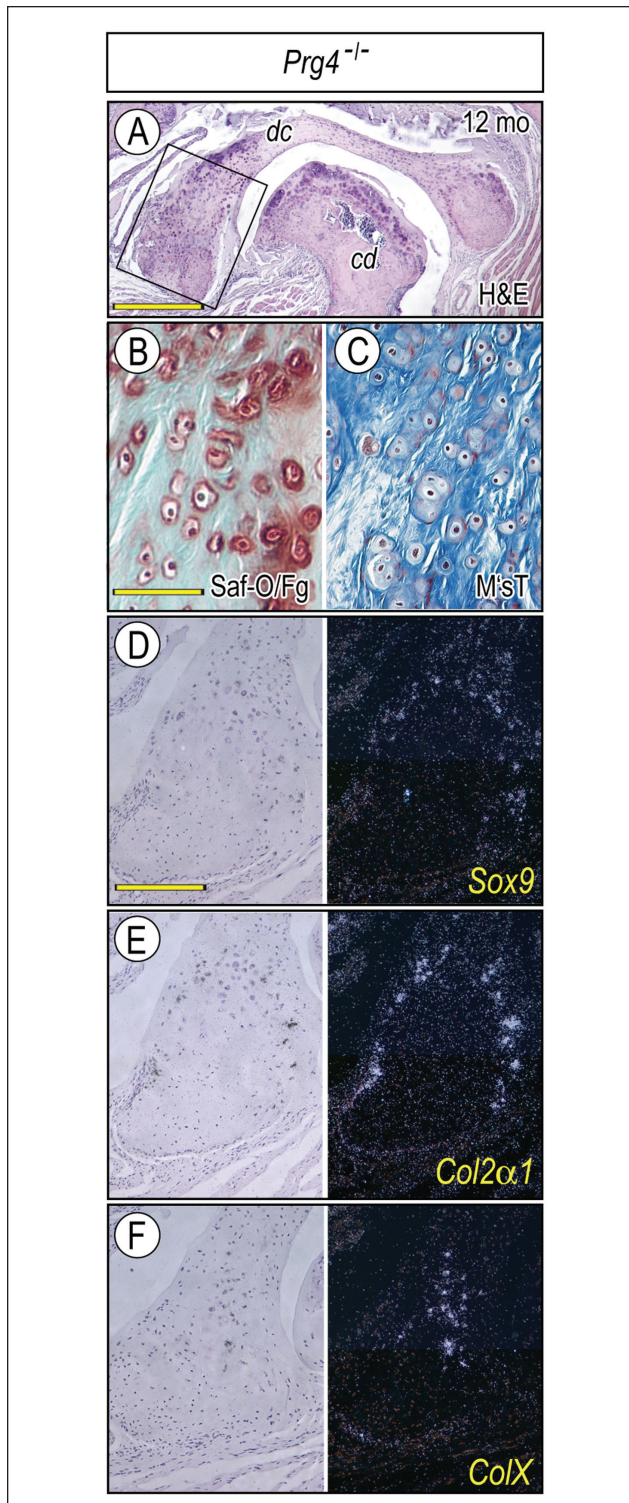

**Appendix Figure 2.** Characterization of ectopic cartilage in *Prg4*<sup>-/-</sup> discs. Frontal sections prepared from temporomandibular joints and discs from 12-mo-old *Prg4*<sup>-/-</sup> mice were processed for hematoxylin and eosin (H&E; **A**), safranin O/fast green (Saf-O/Fg; **B**), and Masson's trichrome staining (M'sT; **C**) and in situ hybridization with isotope-labeled riboprobes for *Sox9* (**D**), *Col2α1* (**E**), and *ColX* (**F**). In situ hybridization data corresponding to the boxed area in panel A are shown in panels D–F. Note that the cartilaginous tissue is characterized by nonhomogenous

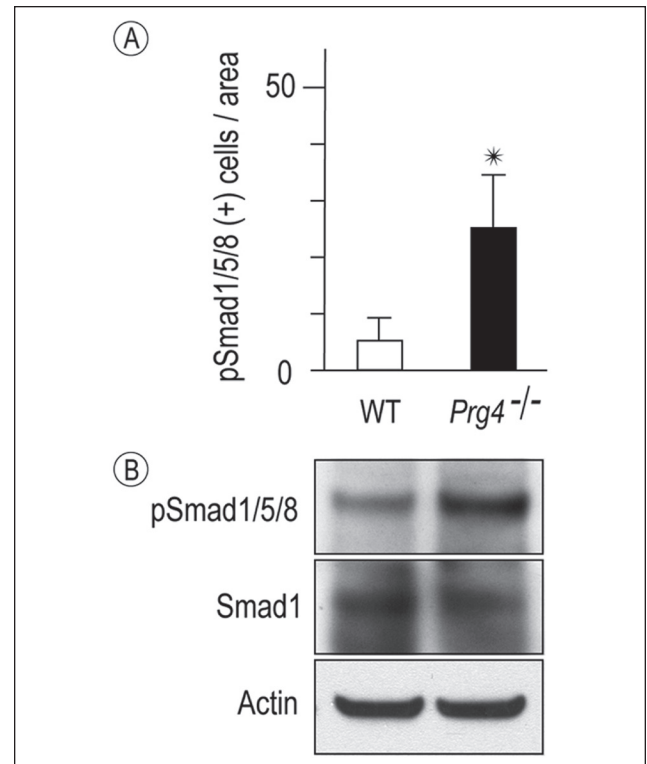

**Appendix Figure 3.** Increased bone morphogenetic protein signaling in *Prg4*<sup>-/-</sup> discs. **(A)** Parasagittal sections prepared from temporomandibular joints and discs from 4-mo-old *Prg4*<sup>-/-</sup> and control mice were processed for detection of phosphorylated Smad 1/5/8 (pSmad1/5/8). pSmad1/5/8-positive cells were counted in 3 to 4 randomly selected sections (approximately 100 to 120 cells/area) from each sample ( $n = 3$  for each mouse/each group) and are presented as average number  $\pm$  SD.  $P < 0.05$  was considered as statistically significant ( $*P < 0.01$ ). **(B)** Western blot analysis of disc extracts from adult *Prg4*<sup>-/-</sup> and age-matched control mice, with antibodies of pSmad1/5/8, total Smad1, and actin. Note the increased levels of activated pSmad1/5/8 in *Prg4*<sup>-/-</sup> discs versus control discs. Disc tissues were lysed and homogenized in ice-cold RIPA buffer with protease and phosphatase inhibitors. Proteins were denatured by SDS sample buffer and electrophoresed on 4% to 15% SDS-bis-Tris gels (20  $\mu$ g per lane) and transferred to PVDF membranes (Invitrogen). Membranes were blocked by 3% bovine serum albumin in phosphate-buffered saline with 0.1% Tween 20 and then incubated overnight at 4 °C with dilutions of antibodies against pSmad1/5/8 (13820, 1:1,000; Cell Signaling Technology, Danvers, MA, USA), Smad1 (9743, 1:1,000; Cell Signaling Technology), or actin (2066, 1:2,000; Sigma-Aldrich, St. Louis, MO, USA). Horseradish peroxidase-conjugated donkey anti-rabbit antibodies were used as the secondary antibodies (NA934V, 1:2,000; GE Healthcare, Little Chalfont, UK). The SuperSignal West Pico Chemiluminescent Substrate (Thermo Fisher Scientific, Waltham, MA, USA) was used to detect antigen-antibody complexes. The membranes were reprobbed with antiactin antibodies as a loading control. WT, wild type.

interterritorial and pericellular safranin O-stained proteoglycan matrix and by a collagen-rich matrix stained with Masson's trichrome. Note also that *Sox9*- and *Col2α1*-expressing chondrocytes are present in the peripheral area of the developing cartilaginous tissue and that *ColX*-expressing hypertrophying chondrocytes are located in the central region. Scale bars: 450  $\mu$ m in A; 35  $\mu$ m in B, also for C; 250  $\mu$ m in D, also for E, F. cd, condyle; dc, disc.
